# Supplementary material for: Oleanolic acid and moderate drinking increase the pancreatic GLP-1R expression of the β -cell mass deficiency induced hyperglycemia
Source: PeerJ journal article supplement (doi:10.7717/peerj.15705), 2023-07-24
Supplement: Fig1Physiology.zip [file Fig.1 Body weight.xlsx]

## Sheet: Body weight
Group		Body weight/g
One week
control		224
control		228
control		250
control		310
control		350
control		315
control		310
control		302
control		300
control		305
hyperglycemia		260.4
hyperglycemia		243.2						Mean	Control	STZ	OA	EtOH	OA+EtOH		Std. Error of Mean	Control	STZ	OA	EtOH	OA+EtOH
hyperglycemia		246.1						Week1	289.4	209.2	212.7	204.9	188.7		Week1	13.03	10.68	13.47	10.08	9.754
hyperglycemia		227.3						Week2	306.9	201	203.1	210.5	192.1		Week2	14.57	8.917	14.19	13.03	12.88
hyperglycemia		207.6						Week3	305.4	199.4	174.4	200.4	188.8		Week3	11.19	8.17	21.19	8.066	16.19
hyperglycemia		198.3						Week4	352.1	206.5	197.5	222.7	183.2		Week4	18.2	7.087	14.1	18.07	16.47
hyperglycemia		190.5						Week5	343.5	195.9	194.9	211.8	188.4		Week5	16.97	9.663	15.17	14.07	16.18
hyperglycemia		185.7						Week6	368.3	192.3	184.1	228.3	190.4		Week6	14.53	8.438	15.7	31.12	21.53
hyperglycemia		172.2
hyperglycemia		160.2
ETOH		209.9
ETOH		207.2
ETOH		163.9
ETOH		201.6
ETOH		263
ETOH		180.8
ETOH		204.9
ETOH		208.1
OA		290
OA		276.3
OA		233.6
OA		225.1
OA		199.8
OA		186.8
OA		185.5
OA		184.8
OA		180
OA		164.9
OA+5%Eoth		161.2
OA+5%Eoth		167.3
OA+5%Eoth		164.3
OA+5%Eoth		170.6
OA+5%Eoth		176.8
OA+5%Eoth		184.1
OA+5%Eoth		182.4
OA+5%Eoth		204.8
OA+5%Eoth		213.6
OA+5%Eoth		261.8
Two week
Control		223.9
Control		244.2
Control		278.8
Control		347
Control		340
Control		300
Control		310
Control		315
Control		350
Control		360
hyperglycemia		160.1
hyperglycemia		179
hyperglycemia		177.1
hyperglycemia		184.4
hyperglycemia		186.7
hyperglycemia		199.5
hyperglycemia		216
hyperglycemia		228
hyperglycemia		238.1
hyperglycemia		241.2
EOTH		202.9
EOTH		211.2
EOTH		169.5
EOTH		212.2
EOTH		278.4
EOTH		183.2
EOTH		215.8
OA		222.6
OA		202.2
OA		178.9
OA		180.5
OA		148.4
OA		186.9
OA		147.7
OA		290.5
OA		251.2
OA		222.2
OA+5%Eoth		172.1
OA+5%Eoth		190.7
OA+5%Eoth		175.2
OA+5%Eoth		235.4
OA+5%Eoth		285.1
OA+5%Eoth		200.8
OA+5%Eoth		141.8
OA+5%Eoth		168.2
OA+5%Eoth		178.5
OA+5%Eoth		173.4
Three week
Control		258.8
Control		245.5
Control		320
Control		310
Control		310
Control		300
Control		360
Control		290
Control		350
Control		310
hyperglycemia		159.4
hyperglycemia		163.2
hyperglycemia		182.9
hyperglycemia		195.1
hyperglycemia		187.5
hyperglycemia		216
hyperglycemia		222.2
hyperglycemia		212.4
hyperglycemia		220.2
hyperglycemia		235
EOTH		206.2
EOTH		213.4
EOTH		165.2
EOTH		221.8
EOTH		191.8
EOTH		182.8
EOTH		221.6
OA		212.3
OA		202
OA		178.6
OA		167.5
OA		135.4
OA		184.7
OA		27.2
OA		244.4
OA		217.5
OA+5%Eoth		165.3
OA+5%Eoth		172.4
OA+5%Eoth		225.8
OA+5%Eoth		191.3
OA+5%Eoth		301
OA+5%Eoth		134.5
OA+5%Eoth		171
OA+5%Eoth		173.1
OA+5%Eoth		164.7
Four week
Control		261.9
Control		268.8
Control		410
Control		310
Control		420
Control		390
Control		370
Control		320
Control		390
Control		380
hyperglycemia		183.5
hyperglycemia		168.3
hyperglycemia		188.3
hyperglycemia		198.1
hyperglycemia		221
hyperglycemia		234.8
hyperglycemia		210.3
hyperglycemia		234
hyperglycemia		202.4
hyperglycemia		224.7
EOTH		211.9
EOTH		225.3
EOTH		163
EOTH		236.4
EOTH		311.4
EOTH		179.2
EOTH		231.4
OA		175.6
OA		162.3
OA		135.5
OA		212.5
OA		199.2
OA		172.1
OA		276.6
OA		236.6
OA		207.3
OA+5%Eoth		172
OA+5%Eoth		147.3
OA+5%Eoth		224
OA+5%Eoth		193
OA+5%Eoth		290
OA+5%Eoth		118
OA+5%Eoth		171.5
OA+5%Eoth		167
OA+5%Eoth		166.2
Five week
Control		269.8
Control		273.4
Control		310
Control		396
Control		360
Control		390
Control		290
Control		400
Control		345.5
Control		400
hyperglycemia		181.3
hyperglycemia		187
hyperglycemia		156.5
hyperglycemia		160.5
hyperglycemia		179.6
hyperglycemia		227.3
hyperglycemia		220.4
hyperglycemia		230
hyperglycemia		220.6
EOTH		198
EOTH		221.5
EOTH		153.9
EOTH		236.5
EOTH		263
EOTH		179
EOTH		231
OA		178.4
OA		201.8
OA		161.4
OA		176.6
OA		142.9
OA		201.8
OA		211
OA		284.9
OA+5%Eoth		220.1
OA+5%Eoth		290
OA+5%Eoth		163.9
OA+5%Eoth		161.7
OA+5%Eoth		179.2
OA+5%Eoth		170.1
OA+5%Eoth		153.4
OA+5%Eoth		168.8
Six week
Control		287.4
Control		291.2
Control		350.6
Control		366.9
Control		393
Control		406.5
Control		398.8
Control		406.2
Control		372
Control		410
hyperglycemia		175.5
hyperglycemia		154.6
hyperglycemia		157.5
hyperglycemia		190.4
hyperglycemia		195.3
hyperglycemia		220.7
hyperglycemia		203.7
hyperglycemia		223
hyperglycemia		210.2
EOTH		192.2
EOTH		219.2
EOTH		146.2
EOTH		241.3
EOTH		400
EOTH		174.7
EOTH		224.2
OA		169.5
OA		197.5
OA		173.4
OA		153.5
OA		128
OA		174.5
OA		198
OA		278.6
OA+5%Eoth		330
OA+5%Eoth		212.6
OA+5%Eoth		175.1
OA+5%Eoth		156.3
OA+5%Eoth		164.2
OA+5%Eoth		138.7
OA+5%Eoth		155.4
OA+5%Eoth		191.2
