# Supplementary material for: Oleanolic acid and moderate drinking increase the pancreatic GLP-1R expression of the β -cell mass deficiency induced hyperglycemia
Source: PeerJ journal article supplement (doi:10.7717/peerj.15705), 2023-07-24
Supplement: Fig1Physiology.zip [file Fig.1 FBG.xlsx]

## Sheet: Merge
Group		Fast blood glucose/mmol/L
One week
control		5
control		5.3
control		5.3				Mean	Control	hyperglycemia	OA	EtOH	OA+EtOH		Std. Error of Mean	Control	hyperglycemia	OA	EtOH	OA+EtOH
control		5.9				week1	5.13	25.07	19.67	18.31	11.34		week1	0.1317	2.753	3.02	2.942	1.815
control		4.6				week2	5.12	28.84	16.69	16.5	22.79		week2	0.289	1.573	2.128	2.085	2.896
control		4.7				week3	5.96	28.68	24.79	26.03	27.23		week3	0.3184	1.639	3.203	4.147	2.795
control		4.6				week4	6.42	29.29	27.82	25.17	23.81		week4	0.2398	0.9233	2.599	3.875	4.136
control		5.4				week5	5.77	32.12	28.81	26.39	26.4		week5	0.3936	1.415	2.556	3.645	4.676
control		5.4				week6	6.4	30.49	26.34	25.3	25.81		week6	0.319	1.469	3.871	4.209	4.643
control		5.1
hyperglycemia		35
hyperglycemia		21.6
hyperglycemia		16.3
hyperglycemia		35
hyperglycemia		18.8
hyperglycemia		20.5
hyperglycemia		16.5
hyperglycemia		17
hyperglycemia		35
hyperglycemia		35
ETOH		35
ETOH		12.4
ETOH		22.1
ETOH		23.5
ETOH		11.9
ETOH		10.9
ETOH		18.2
ETOH		12.5
OA		26.9
OA		27.7
OA		24.5
OA		16
OA		8.6
OA		7.7
OA		16.3
OA		34.6
OA		8.4
OA		26
OA+5%Eoth		13.4
OA+5%Eoth		8.4
OA+5%Eoth		24.5
OA+5%Eoth		16.4
OA+5%Eoth		8.7
OA+5%Eoth		5.7
OA+5%Eoth		8.2
OA+5%Eoth		7.5
OA+5%Eoth		13.4
OA+5%Eoth		7.2
Two week
Control		4.7
Control		7.4
Control		4.4
Control		5.6
Control		4.4
Control		4.7
Control		5.4
Control		5.4
Control		4.6
Control		4.6
hyperglycemia		29.5
hyperglycemia		35
hyperglycemia		27.1
hyperglycemia		35
hyperglycemia		26.2
hyperglycemia		22.8
hyperglycemia		34.3
hyperglycemia		31.4
hyperglycemia		21.6
hyperglycemia		25.5
EOTH		24.5
EOTH		13.4
EOTH		9.8
EOTH		15.2
EOTH		13.1
EOTH		15.9
EOTH		23.6
OA		11.5
OA		24.4
OA		5.6
OA		18.1
OA		17.1
OA		23.1
OA		8.4
OA		17.2
OA		15.6
OA		25.9
OA+5%Eoth		32.5
OA+5%Eoth		27.7
OA+5%Eoth		28.3
OA+5%Eoth		5.2
OA+5%Eoth		26
OA+5%Eoth		7.4
OA+5%Eoth		26.6
OA+5%Eoth		24.9
OA+5%Eoth		21.2
OA+5%Eoth		28.1
Three week
Control		6.2
Control		4.6
Control		6.5
Control		6.3
Control		7.9
Control		5.4
Control		5.3
Control		4.8
Control		6.9
Control		5.7
hyperglycemia		28.5
hyperglycemia		24.4
hyperglycemia		29.8
hyperglycemia		25
hyperglycemia		35
hyperglycemia		19.6
hyperglycemia		35
hyperglycemia		26.2
hyperglycemia		28.3
hyperglycemia		35
EOTH		35
EOTH		35
EOTH		30.5
EOTH		35
EOTH		7
EOTH		16.5
EOTH		23.2
OA		9.3
OA		28.5
OA		25.5
OA		30.8
OA		11.7
OA		29.4
OA		17.9
OA		35
OA		35
OA+5%Eoth		21.4
OA+5%Eoth		35
OA+5%Eoth		30.1
OA+5%Eoth		30
OA+5%Eoth		8.3
OA+5%Eoth		24.8
OA+5%Eoth		35
OA+5%Eoth		32.4
OA+5%Eoth		28.1
Four week
Control		6.1
Control		5.6
Control		6
Control		6.5
Control		8.4
Control		6.7
Control		6.3
Control		6.1
Control		6.1
Control		6.4
hyperglycemia		26.3
hyperglycemia		30.4
hyperglycemia		29.1
hyperglycemia		29.1
hyperglycemia		35
hyperglycemia		27.6
hyperglycemia		31.6
hyperglycemia		26.1
hyperglycemia		31.6
hyperglycemia		26.1
EOTH		35
EOTH		35
EOTH		26.9
EOTH		35
EOTH		12.2
EOTH		17.3
EOTH		14.8
OA		35
OA		27.9
OA		25.4
OA		35
OA		27.8
OA		20.4
OA		11.9
OA		32
OA		35
OA+5%Eoth		29.1
OA+5%Eoth		8
OA+5%Eoth		26.1
OA+5%Eoth		30.5
OA+5%Eoth		5
OA+5%Eoth		10.6
OA+5%Eoth		35
OA+5%Eoth		35
OA+5%Eoth		35
Five week
Control		6.8
Control		6.3
Control		5.7
Control		6.2
Control		7.2
Control		7.1
Control		3.2
Control		5.6
Control		5
Control		4.6
hyperglycemia		23.3
hyperglycemia		35
hyperglycemia		30
hyperglycemia		33.1
hyperglycemia		27.7
hyperglycemia		35
hyperglycemia		35
hyperglycemia		35
hyperglycemia		35
EOTH		28
EOTH		24.6
EOTH		35
EOTH		13.3
EOTH		35
EOTH		35
EOTH		13.8
OA		24.7
OA		31.6
OA		31.9
OA		35
OA		16.4
OA		35
OA		35
OA		20.9
OA+5%Eoth		28.4
OA+5%Eoth		4.9
OA+5%Eoth		32.2
OA+5%Eoth		35
OA+5%Eoth		35
OA+5%Eoth		35
OA+5%Eoth		35
OA+5%Eoth		5.7
Six week
Control		6.9
Control		5.4
Control		4.2
Control		5.8
Control		7.6
Control		6.9
Control		7
Control		6.8
Control		7.1
Control		6.3
hyperglycemia		28.1
hyperglycemia		35
hyperglycemia		26.3
hyperglycemia		30.9
hyperglycemia		31.1
hyperglycemia		30.9
hyperglycemia		35
hyperglycemia		35
hyperglycemia		22.1
EOTH		23
EOTH		35
EOTH		35
EOTH		35
EOTH		10.3
EOTH		10.4
EOTH		28.4
OA		35
OA		35
OA		25.7
OA		26.7
OA		5.4
OA		33
OA		35
OA		14.9
OA+5%Eoth		6.3
OA+5%Eoth		34
OA+5%Eoth		28.6
OA+5%Eoth		35
OA+5%Eoth		3.7
OA+5%Eoth		35
OA+5%Eoth		28.9
OA+5%Eoth		35
