# Supplementary material for: Oleanolic acid and moderate drinking increase the pancreatic GLP-1R expression of the β -cell mass deficiency induced hyperglycemia
Source: PeerJ journal article supplement (doi:10.7717/peerj.15705), 2023-07-24
Supplement: Fig1Physiology.zip [file Fig.1 Food intake.xlsx]

## Sheet: Food
Group				Mean of food intake per day
Control	Total food weight(g)	Average food intake(g)	Animal		Control	Hyperglycemia	5%Eoth	OA	OA+5%EOTH
oen week	1404.4	20.0629	10	one week	20.0629	28.3129	29.9786	24.4443	21.8643
two week	1531.3	21.8757	10	two week	21.8757	34.6943	30.6	26.4057	24.1671
three week	1509.4	21.5629	10	three week	21.5629	35	42.8592	33.4286	34.3651
four week	1421.9	20.3129	10	four week	20.3129	36.2171	41.9898	38.0952	35.9254
five week	1287.5	18.3929	10	five week	18.3929	38.0952	36.9388	36.5071	33.3982
six week	1442	20.6	10	six week	20.6	38.7762	39	37.9357	32.0964
STZ model
one week	1981.9	28.3129	10
two week	2428.6	34.6943	10
three week	2450	35	10
four week	2535.2	36.2171	10
five week	2400	38.0952	9
six week	2442.9	38.7762	9
oA
one week	1711.1	24.4443	10
two week	1848.4	26.4057	10
three week	2106	33.4286	9
four week	2400	38.0952	9
five week	2044.4	36.5071	8
six week	2124.4	37.9357	8
5%Eoth
one week	1678.8	29.9786	8
two week	1499.4	30.6	7
three week	2100.1	42.8592	7
four week	2057.5	41.9898	7
five week	1810	36.9388	7
six week	1911	39	7
oA +E
one week	1530.5	21.8643	10
two week	1691.7	24.1671	10
three week	2165	34.3651	9
four week	2263.3	35.9254	9
five week	1870.3	33.3982	8
six week	1797.4	32.0964	8
