# Supplementary material for: Oleanolic acid and moderate drinking increase the pancreatic GLP-1R expression of the β -cell mass deficiency induced hyperglycemia
Source: PeerJ journal article supplement (doi:10.7717/peerj.15705), 2023-07-24
Supplement: Fig2PASLiver1.zip [file Fig.2 Glycogen ratio.xlsx]

## Sheet: Sheet1
Control	Total area(pixel)	PAS area(pixel)	PAS area%			hyperglycemia	Total area(pixel)	PAS area(pixel)	PAS area%			OA	Total area(pixel)	PAS area(pixel)	PAS area%			Ethanol	Total area(pixel)	PAS area(pixel)	PAS area%			OA+Ethanol	Total area(pixel)	PAS area(pixel)	PAS area%
1	5184000	59753	1.15264			1	5184000	329386	6.354			1	5184000	7176166	13.843			1	4894872	165000	3.37087			1	5184000	35287	0.681
2	5184000	137568	2.654			2	5184000	167529	3.232			2	5184000	379501	7.321			2	5184000	205607	3.966			2	5184000	77480	1.495
3	5184000	215220	4.152			3	5184000	277462	5.352			3	5184000	319228	6.158			3	5184000	165740	3.197			3	5184000	44074	0.85
4	5184000	49789	0.96			4	5184000	306663	5.916			4	5184000	344890	6.653			4	5184000	169699	3.274			4	5184000	88188	1.701
5	5184000	80571	1.554			5	5184000	296043	5.711			5	5184000	327463	6.317			5	5184000	176355	3.402			5	5184000	67270	1.298
6	5184000	41658	0.804			6	5184000	410508	7.919			6	5184000	286548	5.528			6	5184000	129165	2.492			6	5184000	86772	1.674
7	5184000	115127	2.221			7	5184000	303323	5.851			7	5184000	581497	11.27			7	5184000	153504	2.961			7	5184000	35500	0.685
8	5184000	76356	1.473			8	5184000	218168	4.208			8	5184000	487629	9.406			8	5184000	145208	2.801			8	5184000	52892	1.02
9	5184000	224684	4.334			9	5031436	313168	6.22423			9	5184000	54423	10.309			9	5184000	286877	5.534			9	4910276	54946	1.119
10	5184000	17671	0.341			10	5184000	341908	6.595			10	5184000	669026	12.906			10	5184000	226161	4.363			10	5184000	64296	1.24
11	5184000	22934	0.42			11	5184000	376335	7.26			11	5184000	458303	8.841			11	5184000	144197	2.781			11	5184000	75443	1.455
12	5184000	147515	2.846			12	5184000	335832	6.178			12	5184000	367200	7.083			12	5184000	325361	6.276			12	5184000	62111	1.198
13	5184000	167761	3.236			13	4793642	312097	6.51064			13	5184000	375058	7.235			13	5184000	218479	4.214			13	5184000	133326	2.572
14	5184000	81762	1.577			14	5184000	346448	6.683			14	5184000	409401	7.897			14	5184000	194075	3.744			14	5184000	378988	0.733
15	5143006	49021	0.953159			15	5184000	267389	5.158			15	5184000	305091	5.885			15	5184000	216670	4.18			15	5184000	26488	0.511
16	5184000	86685	1.672			16	5184000	463837	8.947			16	5184000	218764	4.22			16	5184000	320233	6.177			16	5184000	2167	0.417
17	5184000	125557	2.422			17	5184000	247385	4.772			17	5184000	285929	5.516			17	5184000	330112	6.368			17	5184000	29918	0.577
18	5184000	51107	0.98586			18	5184000	420575	8.113			18	5184000	231761	4.471			18	5184000	350929	6.769			18	5184000	42072	0.825
19	5184000	88997	1.71			19	5184000	251096	4.844			19	5184000	233696	4.508			19	5184000	356272	6.837			19	5184000	45706	0.882
20	5184000	76033	1.467			20	5184000	356741	6.882			20	5184000	242203	4.672			20	5184000	359944	6.943			20	5184000	54650	1.054
21	5184000	71091	1.371			21	5184000	282962	5.458			21	4897836	124245	2.53673			21	5184000	264120	5.095			21	5184000	42574	0.821
22	5184000	82326	1.588			22	5184000	331163	6.388			22	5184000	268992	5.189			22	5184000	130892	2.525			22	5184000	28022	0.541
23	5184000	88537	1.708			23	5184000	224585	4.332			23	5184000	392395	7.569			23	5184000	183651	3.543			23	5184000	31229	0.602
24	5184000	66468	1.282			24	4898412	282751	5.7723			24	5184000	379660	7.324			24	5184000	307770	5.937			24	5184000	56036	1.081
25	5184000	131939	2.545			25	5184000	300330	5.793			25	5184000	415047	8.006			25	5184000	72550	1.399			25	5184000	41571	0.802
26	5184000	123822	2.389			26	4777822	276651	5.79032			26	5184000	258379	4.984			26	5184000	121814	2.35			26	5184000	117711	2.271
27	5184000	140652	2.713			27	5184000	240966	4.648			27	5184000	345321	6.661			27	5184000	136499	2.633			27	5184000	10745	2.073
28	5184000	149812	2.89			28	5184000	581917	4.86			28	5184000	214404	4.136			28	5184000	63765	1.23			28	5184000	132961	2.565
29	5184000	109052	2.104			29	5184000	335147	6.465			29	5184000	312603	6.03			29	5184000	393588	7.592			29	5184000	126191	2.434
30	5184000	115814	2.234			30	5184000	260749	5.03			30	5011260	297035	5.92735			30	5184000	260487	5.025			30	5184000	177140	3.417
31	5184000	103912	2.004			31	5184000	171368	3.306			31	4838520	207492	4.003			31	5184000	263454	5.082			31	5184000	48598	0.937
32	5184000	64279	1.4			32	5184000	267028	5.151			32	5184000	270642	5.221			32	5184000	183052	3.531			32	5184000	102416	1.976
33	5184000	45714	0.882			33	3862973	178409	4.61844			33	5184000	282355	5.447			33	5184000	299936	5.789			33	5184000	86334	1.665
34	5184000	84867	1.637			34	5184000	259419	5.004			34	5184000	203747	3.93			34	5184000	125965	2.43			34	5184000	101046	1.949
35	5184000	94726	1.827			35	5184000	289189	5.578			35	5184000	237794	4.581			35	5184000	125953	2.43			35	5184000	106651	2.057
36	5184000	56109	1.082			36	5184000	357993	6.06			36	5184000	169097	3.262			36	5184000	198282	3.825			36	5184000	103050	1.988
37	5184000	99239	1.914									37	5184000	334350	6.454			37	5184000	185821	3.585			37	5184000	159720	3.081
38	4961180	27718	0.558698									38	5184000	431264	8.319			38	5184000	518956	10.011			38	5184000	94413	1.821
39	5184000	94508	1.823									39	5184000	368319	7.105			39	5184000	405602	7.824			39	5184000	50719	0.978
40	5184000	25960	0.501									40	5184000	373107	7.197			40	5184000	477150	9.204			40	5184000	85052	1.641
41	5184000	146095	2.818
42	5184000	63255	1.2
43	5184000	91574	1.766
44	5184000	79136	1.527
45	5184000	99040	1.91
Resolution of the picture	2880x1800	pixle
	50μm=	325	pixel
	1μm=	6.5	pixel
