# Supplementary material for: Oleanolic acid and moderate drinking increase the pancreatic GLP-1R expression of the β -cell mass deficiency induced hyperglycemia
Source: PeerJ journal article supplement (doi:10.7717/peerj.15705), 2023-07-24
Supplement: Fig4INSandGLU.zip [file Fig.4 Insulin and Glucagon.xlsx]

## Sheet: Sheet1
Control group positive cell numbers							hyperglycemia group positive cell numbers							OA group positive cell numbers							Ethanol positive cell numbers							OA+E positive cell numbers
NO.	Insulin	Glucagon	insulin+glucogon	insulin/insulin+glucogon	glucagon/insulin	glucagon/glucagon+insulin	NO.	Insulin	Glucagon	insulin+glucagon	insulin/insulin+glucogon	glucagon/insulin	glucagon/glucagon+insulin	NO.	Insulin	Glucagon	insulin+glucogon	insulin/insulin+glucogon	glucagon/insulin	glucagon/glucagon+insulin	NO.	Insulin	Glucagon	insulin+glucogon	insulin/insulin+glucogon	glucagon/insulin	glucagon/glucagon+insulin	NO.	Insulin	Glucagon	insulin+glucogon	insulin/insulin+glucogon	glucagon/insulin	glucagon/glucagon+insulin
1	145	34	179	0.810056	0.234483	0.189944	1	14	60	74	0.189189	4.28571	0.810811	1	13	25	38	0.342105	1.92308	0.657895	1	2	53	55	0.0363636	26.5	0.963636	1	6	189	195	0.0307692	31.5	0.969231
2	33	9	42	0.785714	0.272727	0.214286	2	5	21	26	0.192308	4.2	0.807692	2	14	101	115	0.121739	7.21429	0.878261	2	1	38	39	0.025641	38	0.974359	2	8	135	143	0.0559441	16.875	0.944056
3	187	30	217	0.861751	0.160428	0.138249	3	8	22	30	0.266667	2.75	0.733333	3	10	12	22	0.454545	1.2	0.545455	3	1	63	64	0.015625	63	0.984375	3	1	23	24	0.0416667	23	0.958333
4	168	54	222	0.756757	0.321429	0.243243	4	9	31	40	0.225	3.44444	0.775	4	13	169	182	0.0714286	13	0.928571	4	3	7	10	0.3	2.33333	0.7	4	5	41	46	0.108696	8.2	0.891304
5	64	16	80	0.8	0.25	0.2	5	13	21	34	0.382353	1.61538	0.617647	5	5	16	21	0.238095	3.2	0.761905	5	1	23	24	0.0416667	23	0.958333	5	1	95	96	0.0104167	95	0.989583
6	240	59	299	0.802676	0.245833	0.197324	6	8	10	18	0.444444	1.25	0.555556	6	30	13	43	0.697674	0.433333	0.302326	6	2	20	22	0.0909091	10	0.909091	6	2	26	28	0.0714286	13	0.928571
7	171	40	211	0.810427	0.233918	0.189573	7	23	50	73	0.315068	2.17391	0.684932	7	14	33	47	0.297872	2.35714	0.702128	7	3	87	90	0.0333333	29	0.966667	7	6	36	42	0.142857	6	0.857143
8	165	42	207	0.797101	0.254545	0.202899	8	10	60	70	0.142857	6	0.857143	8	24	43	67	0.358209	1.79167	0.641791	8	4	20	24	0.166667	5	0.833333	8	3	41	44	0.0681818	13.6667	0.931818
9	57	18	75	0.76	0.315789	0.24	9	23	88	111	0.207207	3.82609	0.792793	9	11	49	60	0.183333	4.45455	0.816667	9	13	73	86	0.151163	5.61538	0.848837	9	3	47	50	0.06	15.6667	0.94
10	42	17	59	0.711864	0.404762	0.288136	10	8	64	72	0.111111	8	0.888889	10	4	32	36	0.111111	8	0.888889	10	7	65	72	0.0972222	9.28571	0.902778	10	2	17	19	0.105263	8.5	0.894737
11	96	22	118	0.813559	0.229167	0.186441	11	14	68	82	0.170732	4.85714	0.829268	11	4	46	50	0.08	11.5	0.92	11	2	30	32	0.0625	15	0.9375	11	11	114	125	0.088	10.3636	0.912
12	270	18	288	0.9375	0.0666667	0.0625	12	14	24	38	0.368421	1.71429	0.631579	12	11	50	61	0.180328	4.54545	0.819672	12	13	133	146	0.0890411	10.2308	0.910959	12	3	55	58	0.0517241	18.3333	0.948276
13	72	18	90	0.8	0.25	0.2	13	16	22	38	0.421053	1.375	0.578947	13	9	19	28	0.321429	2.11111	0.678571	13	1	37	38	0.0263158	37	0.973684	13	3	57	60	0.05	19	0.95
14	140	9	149	0.939597	0.0642857	0.0604027	14	3	23	26	0.115385	7.66667	0.884615	14	8	20	28	0.285714	2.5	0.714286	14	3	101	104	0.0288462	33.6667	0.971154	14	1	87	88	0.0113636	87	0.988636
15	111	34	145	0.765517	0.306306	0.234483	15	12	14	26	0.461538	1.16667	0.538462	15	28	53	81	0.345679	1.89286	0.654321	15	11	79	90	0.122222	7.18182	0.877778	15	7	89	96	0.0729167	12.7143	0.927083
16	28	6	34	0.823529	0.214286	0.176471	16	7	31	38	0.184211	4.42857	0.815789	16	3	5	8	0.375	1.66667	0.625	16	10	196	206	0.0485437	19.6	0.951456	16	4	28	32	0.125	7	0.875
17	45	7	52	0.865385	0.155556	0.134615	17	9	42	51	0.176471	4.66667	0.823529	17	5	8	13	0.384615	1.6	0.615385	17	8	143	151	0.0529801	17.875	0.94702	17	6	96	102	0.0588235	16	0.941176
18	121	43	164	0.737805	0.355372	0.262195	18	13	48	61	0.213115	3.69231	0.786885	18	5	19	24	0.208333	3.8	0.791667	18	2	33	35	0.0571429	16.5	0.942857	18	8	95	103	0.0776699	11.875	0.92233
19	100	30	130	0.769231	0.3	0.230769	19	18	61	79	0.227848	3.38889	0.772152	19	16	17	33	0.484848	1.0625	0.515152	19	1	34	35	0.0285714	34	0.971429	19	2	196	198	0.010101	98	0.989899
20	35	9	44	0.795455	0.257143	0.204545	20	17	64	81	0.209877	3.76471	0.790123	20	3	13	16	0.1875	4.33333	0.8125	20	18	164	182	0.0989011	9.11111	0.901099	20	1	20	21	0.047619	20	0.952381
21	146	43	189	0.772487	0.294521	0.227513	21	33	68	101	0.326733	2.06061	0.673267	21	5	20	25	0.2	4	0.8	21	54	179	233	0.23176	3.31481	0.76824	21	23	10	33	0.69697	0.434783	0.30303
22	30	9	39	0.769231	0.3	0.230769	22	20	57	77	0.25974	2.85	0.74026	22	7	42	49	0.142857	6	0.857143	22	31	45	76	0.407895	1.45161	0.592105	22	45	13	58	0.775862	0.288889	0.224138
23	196	48	244	0.803279	0.244898	0.196721	23	18	30	48	0.375	1.66667	0.625	23	12	32	44	0.272727	2.66667	0.727273	23	17	35	52	0.326923	2.05882	0.673077	23	32	14	46	0.695652	0.4375	0.304348
24	23	4	27	0.851852	0.173913	0.148148	24	12	75	87	0.137931	6.25	0.862069	24	9	22	31	0.290323	2.44444	0.709677	24	30	46	76	0.394737	1.53333	0.605263	24	56	32	88	0.636364	0.571429	0.363636
25	30	6	36	0.833333	0.2	0.166667	25	2	35	37	0.0540541	17.5	0.945946	25	11	26	37	0.297297	2.36364	0.702703	25	19	87	106	0.179245	4.57895	0.820755	25	192	76	268	0.716418	0.395833	0.283582
26	83	22	105	0.790476	0.26506	0.209524	26	4	74	78	0.0512821	18.5	0.948718	26	5	8	13	0.384615	1.6	0.615385	26	17	130	147	0.115646	7.64706	0.884354	26	28	54	82	0.341463	1.92857	0.658537
27	235	66	301	0.780731	0.280851	0.219269	27	12	160	172	0.0697674	13.3333	0.930233	27	7	40	47	0.148936	5.71429	0.851064	27	21	134	155	0.135484	6.38095	0.864516	27	116	51	167	0.694611	0.439655	0.305389
28	15	5	20	0.75	0.333333	0.25	28	6	34	40	0.15	5.66667	0.85	28	15	39	54	0.277778	2.6	0.722222	28	11	48	59	0.186441	4.36364	0.813559	28	19	31	50	0.38	1.63158	0.62
29	125	24	149	0.838926	0.192	0.161074	29	4	19	23	0.173913	4.75	0.826087	29	22	64	86	0.255814	2.90909	0.744186	29	15	72	87	0.172414	4.8	0.827586	29	76	32	108	0.703704	0.421053	0.296296
30	541	110	651	0.831029	0.203327	0.168971	30	1	42	43	0.0232558	42	0.976744	30	14	53	67	0.208955	3.78571	0.791045	30	19	31	50	0.38	1.63158	0.62	30	35	32	67	0.522388	0.914286	0.477612
31	81	38	119	0.680672	0.469136	0.319328	31	3	35	38	0.0789474	11.6667	0.921053	31	10	61	71	0.140845	6.1	0.859155	31	10	16	26	0.384615	1.6	0.615385	31	31	18	49	0.632653	0.580645	0.367347
32	148	37	185	0.8	0.25	0.2	32	3	85	88	0.0340909	28.3333	0.965909								32	14	11	25	0.56	0.785714	0.44	32	15	13	28	0.535714	0.866667	0.464286
33	62	21	83	0.746988	0.33871	0.253012	33	6	149	155	0.0387097	24.8333	0.96129															33	44	26	70	0.628571	0.590909	0.371429
34	65	21	86	0.755814	0.323077	0.244186	34	5	24	29	0.172414	4.8	0.827586															34	14	74	88	0.159091	5.28571	0.840909
35	36	7	43	0.837209	0.194444	0.162791	35	2	41	43	0.0465116	20.5	0.953488															35	17	150	167	0.101796	8.82353	0.898204
36	15	6	21	0.714286	0.4	0.285714	36	3	175	178	0.0168539	58.3333	0.983146															36	7	10	17	0.411765	1.42857	0.588235
37	37	3	40	0.925	0.0810811	0.075	37	13	34	47	0.276596	2.61538	0.723404															37	8	42	50	0.16	5.25	0.84
38	73	35	108	0.675926	0.479452	0.324074	38	7	45	52	0.134615	6.42857	0.865385															38	12	19	31	0.387097	1.58333	0.612903
39	56	17	73	0.767123	0.303571	0.232877	39	11	80	91	0.120879	7.27273	0.879121															39	7	56	63	0.111111	8	0.888889
40	185	46	231	0.800866	0.248649	0.199134	40	4	40	44	0.0909091	10	0.909091															40	21	85	106	0.198113	4.04762	0.801887
41	56	23	79	0.708861	0.410714	0.291139	41	1	29	30	0.0333333	29	0.966667															41	1	43	44	0.0227273	43	0.977273
42	23	7	30	0.766667	0.304348	0.233333	42	1	13	14	0.0714286	13	0.928571															42	1	74	75	0.0133333	74	0.986667
43	80	14	94	0.851064	0.175	0.148936	43	1	59	60	0.0166667	59	0.983333															43	1	24	25	0.04	24	0.96
44	58	18	76	0.763158	0.310345	0.236842	44	4	13	17	0.235294	3.25	0.764706															44	1	20	21	0.047619	20	0.952381
45	31	18	49	0.632653	0.580645	0.367347	45	2	40	42	0.047619	20	0.952381															45	3	28	31	0.0967742	9.33333	0.903226
46	54	10	64	0.84375	0.185185	0.15625	46	1	11	12	0.0833333	11	0.916667															46	3	16	19	0.157895	5.33333	0.842105
47	133	14	147	0.904762	0.105263	0.0952381	47	2	16	18	0.111111	8	0.888889															47	1	51	52	0.0192308	51	0.980769
48	19	8	27	0.703704	0.421053	0.296296																						48	1	42	43	0.0232558	42	0.976744
49	43	21	64	0.671875	0.488372	0.328125
50	12	8	20	0.6	0.666667	0.4
51	82	16	98	0.836735	0.195122	0.163265
52	76	19	95	0.8	0.25	0.2
53	10	14	24	0.416667	1.4	0.583333
54	49	7	56	0.875	0.142857	0.125
55	246	44	290	0.848276	0.178862	0.151724
56	75	33	108	0.694444	0.44	0.305556
57	59	24	83	0.710843	0.40678	0.289157
58	48	7	55	0.872727	0.145833	0.127273
59	32	7	39	0.820513	0.21875	0.179487
60	39	6	45	0.866667	0.153846	0.133333
61	179	51	230	0.778261	0.284916	0.221739
62	191	80	271	0.704797	0.418848	0.295203
63	34	5	39	0.871795	0.147059	0.128205
64	35	8	43	0.813953	0.228571	0.186047
65	47	21	68	0.691176	0.446809	0.308824
66	34	9	43	0.790698	0.264706	0.209302
67	245	49	294	0.833333	0.2	0.166667
68	161	44	205	0.785366	0.273292	0.214634
69	294	53	347	0.847262	0.180272	0.152738
70	399	144	543	0.734807	0.360902	0.265193
71	63	11	74	0.851351	0.174603	0.148649
72	329	77	406	0.810345	0.234043	0.189655
Average	107.056	27.125	134.181	0.785704	0.289755	0.214296	Average	9.04255	49.0851	58.1277	0.175656	10.7846	0.824344	Average	11.1935	37.0968	48.2903	0.269345	3.83128	0.730655	Average	11.375	69.7812	81.1562	0.157775	14.1264	0.842225	Average	18.6042	54.6458	73.25	0.233305	17.5892	0.766695
								insulin positive	insulin+glucagon	insulin/ins+glu	glucagon positive	glucagon/insulin	glucagon/ins+glu
							Control	107.056	134.181	0.785704	27.125	0.289755	0.214296
							STZ model	9.04255	58.1277	0.175656	49.0851	10.7846	0.824344
							OA	11.1935	48.2903	0.269345	37.0968	3.83128	0.730655
							Ethanol	11.375	81.1562	0.157775	69.7812	14.1264	0.842225
							OA+Etoh	18.6042	73.25	0.233305	54.6458	17.5892	0.766695
