# Supplementary material for: Oleanolic acid and moderate drinking increase the pancreatic GLP-1R expression of the β -cell mass deficiency induced hyperglycemia
Source: PeerJ journal article supplement (doi:10.7717/peerj.15705), 2023-07-24
Supplement: Fig6RNAexpression.zip [file Fig.6 Diabetic Gene RNA expression level.xlsx]

## Sheet: Merge
Sample Name	Target Name	Cт1	Cт2	Aver of Ct1and2	Average Cт		Sample Name	Target Name	Cт1	Cт2	Cт3	Average Cт		Sample Name	Target Name	Cт1	Cт2	Cт3	Average Cт
P1	18sRNA	13.1079	13.2074	13.1577			P1	Ins1	33.0145	32.8458	32.999	32.9531		P1	Gcg	35.3679	35.3369	36.8524	35.8524
P2	18sRNA	12.998	13.2278	13.1129	13.4753		P2	Ins1	33.8569	33.5247	32.3408	33.2408		P2	Gcg	35.3962	35.7694	35.6473	35.6043
P3	18sRNA	13.5231	13.5231	13.5231			P3	Ins1	33.1164	33.1396	32.978	33.078		P3	Gcg	34.3102	34.7277	34.5189	34.5189
P4	18sRNA	14.1074	14.1074	14.1074			P4	Ins1	33.7896	33.8956	33.8823	33.8558		P4	Gcg	34.3548	34.6325	35.7762	34.9212
Hyperglycemia	18sRNA	14.0737	14.6096	14.3417			Hyperglycemia	Ins1	35.4067	35.6261	35.7775	35.6034		Hyperglycemia	Gcg	32.2109	31.8504	33.9806	32.6806
Hyperglycemia2	18sRNA	13.6701	13.6701	13.6701	13.9		Hyperglycemia2	Ins1	34.6647	35.8523	37.7418	36.0863		Hyperglycemia2	Gcg	33.3521	32.7336	32.8012	32.9623
Hyperglycemia3	18sRNA	13.725	13.725	13.725			Hyperglycemia3	Ins1	36.0964	35.4113	36.6786	36.0621		Hyperglycemia3	Gcg	34.4626	33.2568	33.1097	33.6097
Hyperglycemia4	18sRNA	13.8632	13.8632	13.8632			Hyperglycemia4	Ins1	35.2689	35.2563	35.2926	35.2726		Hyperglycemia4	Gcg	32.4548	32.5659	32.0723	32.3643
OA	18sRNA	15.5386	15.5058	15.5222			OA1	Ins1	33.2039	33.2923	34.5944	33.6969		OA1	Gcg	32.953	32.4843	32.3718	32.603
OA	18sRNA	13.6235	13.6235	13.6235	13.6235		OA2	Ins1	35.1576	35.1656	35.3116	35.2116		OA2	Gcg	32.954	32.948	31.481	32.461
OA	18sRNA	13.9256	13.4273	13.6764			OA3	Ins1	36.1578	35.8176	35.8377	35.9377		OA3	Gcg	32.7451	32.5995	33.7396	33.0281
OA	18sRNA	13.8915	13.8915	13.8915			OA4	Ins1	35.6697	35.5001	35.2849	35.4849		OA4	Gcg	33.5899	33.1026	33.1328	33.2751
Ethanol	18sRNA	15.6989	15.6031	15.651			Ethanol1	Ins1	36.151	36.2238	36.3144	36.2297		Ethanol1	Gcg	33.3729	33.4863	33.1296	33.3296
Ethanol	18sRNA	14.603	14.6462	14.6246	14.6246		Ethanol2	Ins1	34.6151	34.7053	34.1221	34.4808		Ethanol2	Gcg	34.3424	34.3928	32.4735	33.7362
Ethanol	18sRNA	14.5408	13.9667	14.2537			Ethanol3	Ins1	34.5866	33.9406	33.7804	34.1025		Ethanol3	Gcg	34.2728	32.0287	32.0101	32.7705
Ethanol	18sRNA	13.9603	13.7875	13.8739			Ethanol4	Ins1	35.0055	34.139	36.0722	35.0722		Ethanol4	Gcg	33.6024	31.8946	33.6374	33.0448
OA+Etoh	18sRNA	14.3375	14.1217	14.2296			OA+Etoh1	Ins1	33.7398	34.9653	33.3998	34.035		OA+Etoh1	Gcg	32.5365	31.9169	33.1267	32.5267
OA+Etoh	18sRNA	14.202	14.2487	14.2253	14.2253		OA+Etoh2	Ins1	33.5173	35.351	35.4472	34.7718		OA+Etoh2	Gcg	33.8052	32.5695	31.6385	32.6711
OA+Etoh	18sRNA	15.2795	14.9701	15.1248			OA+Etoh3	Ins1	33.7255	33.7459	33.9444	33.8052		OA+Etoh3	Gcg	33.5173	33.7712	32.393	33.2272
OA+Etoh	18sRNA	12.6047	12.6545	12.6296			OA+Etoh4	Ins1	34.6161	34.7508	34.9835	34.7835		OA+Etoh4	Gcg	34.0289	33.6077	31.8983	33.1783
