# Supplementary material for: Oleanolic acid and moderate drinking increase the pancreatic GLP-1R expression of the β -cell mass deficiency induced hyperglycemia
Source: PeerJ journal article supplement (doi:10.7717/peerj.15705), 2023-07-24
Supplement: Fig31IHCinsulin.zip [file Fig.3 Insulin positive cells of islet analysis.xlsx]

## Sheet: Insulin
Control	insulin positive cell NO.	Total Cell NO.in islet	insulin ip/Total	islet area（Pixel）	islet area（um2）	single cell area（um2）	STZ model	insulin positive cell NO.	Total Cell NO.in islet	insulin ip/Total	islet area（Pixel）	islet area（um2）	single cell area（um2）	OA	insulin positive cell NO.	Total Cell NO.in islet	insulin ip/Total	islet area（Pixel）	islet area（um2）	single cell area（um2）	Ethanol	insulin positive cell NO.	Total Cell NO.in islet	insulin ip/Total	islet area（Pixel）	islet area（um2）	single cell area（um2）	OA+Ethanol	insulin positive cell NO.	Total Cell NO.in islet	insulin ip/Total	islet area（Pixel）	islet area（um2）	single cell area（um2）
1	112	153	0.732026	347917	8234.72	53.8217	1	11	112	0.0982143	177223	4194.63	37.452	1	32	272	0.117647	521215	12336.4	45.3546	1	33	108	0.305556	332259	7864.12	72.8159	1	53	221	0.239819	372342	8812.83	39.8771
2	58	72	0.805556	168942	3998.63	55.5365	2	14	94	0.148936	154564	3658.32	38.9183	2	12	19	0.631579	40005	946.864	49.8349	2	15	35	0.428571	45854	1085.3	31.0086	2	30	249	0.120482	478762	11331.6	45.5086
3	59	76	0.776316	199449	4720.69	62.1143	3	8	59	0.135593	85086	2013.87	34.1334	3	6	15	0.4	33028	781.728	52.1152	3	97	418	0.232057	877249	20763.3	49.6729	3	59	150	0.393333	345451	8176.36	54.509
4	118	159	0.742138	516142	12216.4	76.8326	4	20	55	0.363636	93818	2220.54	40.3735	4	11	97	0.113402	176749	4183.41	43.1279	4	14	69	0.202899	150857	3570.58	51.7475	4	21	46	0.456522	118320	2800.47	60.8799
5	281	338	0.831361	986513	23349.4	69.0811	5	11	63	0.174603	130990	3100.36	49.212	5	8	13	0.615385	45155	1068.76	82.2121	5	17	127	0.133858	368215	8715.15	68.6232	5	65	179	0.363128	258242	6112.24	34.1466
6	380	479	0.793319	1500878	35523.7	74.1623	6	19	102	0.186275	166118	3931.79	38.5469	6	62	170	0.364706	328717	7780.28	45.7664	6	9	65	0.138462	162673	3850.25	59.2346	6	44	102	0.431373	161730	3827.93	37.5287
7	116	139	0.834532	306870	7263.2	52.2532	7	14	30	0.466667	72647	1719.46	57.3152	7	30	216	0.138889	403539	9551.22	44.2186	7	36	63	0.571429	195894	4636.54	73.5959	7	7	73	0.0958904	93452	2211.88	30.2997
8	198	243	0.814815	576621	13647.8	56.1639	8	7	61	0.114754	103934	2459.98	40.3275	8	14	38	0.368421	72894	1725.3	45.4027	8	25	59	0.423729	123867	2931.76	49.6909	8	13	22	0.590909	48158	1139.83	51.8107
9	52	69	0.753623	101843	2410.49	34.9346	9	12	45	0.266667	68898	1630.72	36.2383	9	5	22	0.227273	56119	1328.26	60.3755	9	8	78	0.102564	175534	4154.65	53.2648	9	5	12	0.416667	28170	666.746	55.5621
10	229	300	0.763333	709126	16784	55.9468	10	13	46	0.282609	105307	2492.47	54.1842	10	6	63	0.0952381	119585	2830.41	44.9272	10	43	89	0.483146	286558	6782.44	76.2072	10	35	211	0.165877	550308	13025	61.7301
11	306	445	0.68764	1282242	30348.9	68.1998	11	10	63	0.15873	110902	2624.9	41.6651	11	9	53	0.169811	88643	2098.06	39.586	11	81	296	0.273649	1126171	26654.9	90.0505	11	77	185	0.416216	370034	8758.2	47.3416
12	164	244	0.672131	818682	19377.1	79.4143	12	18	101	0.178218	192708	4561.14	45.1598	12	21	186	0.112903	387754	9177.61	49.342	12	40	94	0.425532	212643	5032.97	53.5422	12	91	256	0.355469	527706	12490.1	48.7894
13	468	646	0.724458	1609283	38089.5	58.9621	13	19	185	0.102703	290565	6877.28	37.1745	13	5	24	0.208333	57852	1369.28	57.0533	13	3	28	0.107143	53916	1276.12	45.5757	13	33	152	0.217105	256206	6064.05	39.895
14	421	532	0.791353	1302429	30826.7	57.945	14	17	33	0.515152	53880	1275.27	38.6444	14	5	23	0.217391	41945	992.781	43.1644	14	11	36	0.305556	104813	2480.78	68.9106	14	14	21	0.666667	77739	1839.98	87.6179
15	60	78	0.769231	156638	3707.41	47.5309	15	12	55	0.218182	84784	2006.72	36.4859	15	15	23	0.652174	48578	1149.78	49.9902	15	120	283	0.424028	937290	22184.4	78.39	15	64	307	0.208469	622377	14730.8	47.9831
16	93	117	0.794872	297126	7032.57	60.1074	16	28	157	0.178344	278405	6589.47	41.9711	16	12	23	0.521739	63551	1504.17	65.3985	16	12	44	0.272727	64303	1521.96	34.5901	16	66	273	0.241758	491794	11640.1	42.6377
17	238	290	0.82069	787559	18640.4	64.2774	17	10	200	0.05	446285	10563	52.8148	17	7	90	0.0777778	164085	3883.67	43.1519	17	12	48	0.25	133841	3167.83	65.9965	17	13	132	0.0984848	255609	6049.92	45.8327
18	224	268	0.835821	722579	17102.5	63.8152	18	81	201	0.402985	316440	7489.7	37.2622	18	11	39	0.282051	66168	1566.11	40.1566	18	6	13	0.461538	24464	579.03	44.5407	18	10	23	0.434783	41989	993.822	43.2097
19	245	324	0.756173	1028451	24342	75.1297	19	10	135	0.0740741	217044	5137.14	38.0529	19	59	228	0.258772	431480	10212.5	44.7919	19	13	31	0.419355	92852	2197.68	70.8929	19	100	280	0.357143	547602	12961	46.2893
20	284	358	0.793296	965817	22859.6	63.8536	20	4	73	0.0547945	22487	2128.95	29.1637	20	65	372	0.174731	732411	17335.2	46.5999	20	21	113	0.185841	403499	9550.27	84.5157	20	39	55	0.709091	95909	2270.04	41.2734
21	99	132	0.75	392120	9280.95	70.3102	21	17	169	0.100592	63631	6024.24	35.6464	21	23	35	0.657143	46231	1094.22	31.2636	21	30	188	0.159574	513820	12161.4	64.6884	21	18	158	0.113924	244780	5793.61	36.6684
22	40	56	0.714286	105076	2487.01	44.4108	22	50	246	0.203252	105782	10014.9	40.7108	22	4	47	0.0851064	66788	1580.78	33.6336	22	7	42	0.166667	140805	3332.66	79.3491	22	21	123	0.170732	208773	4941.37	40.1738
23	109	132	0.825758	445631	10547.5	79.9051	23	4	110	0.0363636	159826	3782.86	34.3897	23	36	131	0.274809	248938	5892.02	44.9773	23	5	42	0.119048	143009	3384.83	80.5912	23	17	27	0.62963	65415	1548.28	57.3439
24	240	340	0.705882	888917	21039.5	61.8808	24	75	269	0.27881	540921	12802.9	47.5943	24	15	37	0.405405	63754	1508.97	40.783	24	5	44	0.113636	156073	3694.04	83.9554	24	30	86	0.348837	145202	3436.73	39.962
25	267	354	0.754237	1129873	26742.6	75.5439	25	41	157	0.261146	364338	8623.38	54.926	25	67	242	0.27686	358102	8475.79	35.0239	25	35	176	0.198864	640982	15171.2	86.1998	25	49	200	0.245	377213	8928.12	44.6406
26	393	485	0.810309	1409376	33358	68.7794	26	14	99	0.141414	68442	3328.49	33.6211	26	20	50	0.4	74513	1763.62	35.2724	26	16	110	0.145455	341998	8094.63	73.5875	26	18	54	0.333333	91248	2159.72	39.9947
27	370	501	0.738523	1436170	33992.2	67.8487	27	6	89	0.0674157	174946	4140.73	46.5251	27	10	38	0.263158	53340	1262.49	33.2233	27	30	152	0.197368	476083	11268.2	74.1331	27	33	90	0.366667	152677	3613.66	40.1517
28	100	161	0.621118	440958	10436.9	64.8253	28	15	129	0.116279	51527	4878.3	37.8162	28	37	223	0.165919	408008	9656.99	43.3049	28	24	101	0.237624	359047	8498.15	84.1401	28	19	51	0.372549	74592	1765.49	34.6175
29	203	271	0.749077	658399	15583.4	57.5034	29	23	173	0.132948	330841	7830.56	45.2633	29	48	220	0.218182	553634	13103.8	59.5626	29	11	78	0.141026	231134	5470.63	70.1362	29	18	80	0.225	187842	4445.96	55.5746
30	198	242	0.818182	691798	16373.9	67.6608	30	19	46	0.413043	73894	1748.97	38.0211	30	37	135	0.274074	270808	6409.66	47.4789	30	3	33	0.0909091	109271	2586.3	78.3726	30	25	70	0.357143	129514	3065.42	43.7917
31	129	158	0.816456	684862	16209.8	102.593	31	47	153	0.30719	225512	5337.56	34.886	31	23	45	0.511111	49737	1177.21	26.1602	31	5	11	0.454545	34347	812.947	73.9042	31	45	266	0.169173	481972	11407.6	42.8858
32	183	237	0.772152	707590	16747.7	70.6654	32	19	99	0.191919	206063	4877.23	49.265	32	32	148	0.216216	294740	6976.09	47.1358	32	6	22	0.272727	80374	1902.34	86.4701	32	66	250	0.264	469751	11118.4	44.4735
33	12	17	0.705882	43710	1034.56	60.8562	33	18	47	0.382979	58593	1386.82	29.5067	33	8	52	0.153846	119613	2831.08	54.4438	33	8	30	0.266667	73315	1735.27	57.8422	33	16	260	0.0615385	533750	12633.1	48.589
34	135	160	0.84375	379265	8976.69	56.1043	34	26	42	0.619048	92753	2195.34	52.2699	34	7	16	0.4375	30148	713.562	44.5976	34	20	58	0.344828	160032	3787.74	65.3059	34	38	203	0.187192	437039	10344.1	50.9562
35	61	78	0.782051	158413	3749.42	48.0695	35	22	139	0.158273	198571	4699.91	33.8123	35	49	94	0.521277	264491	6260.14	66.5973	35	13	27	0.481481	65820	1557.87	57.6989	35	11	50	0.22	98472	2330.7	46.614
36	239	399	0.598997	1563240	36999.8	92.7312	36	25	161	0.15528	256206	6064.05	37.6649	36	15	109	0.137615	200166	4737.66	43.4647	36	9	49	0.183673	146303	3462.79	70.6692	36	15	74	0.202703	223201	5282.86	71.3901
37	120	215	0.55814	729188	17258.9	80.2739	37	20	123	0.162602	207325	4907.1	39.8951	37	15	69	0.217391	136537	3231.64	46.8354	37	9	37	0.243243	117065	2770.77	74.8857	37	22	59	0.372881	101800	2409.47	40.8384
38	345	438	0.787671	1396350	33049.7	75.4559	38	10	36	0.277778	55324	1309.44	36.3734	38	11	29	0.37931	44996	1064.99	36.7239	38	18	80	0.225	274436	6495.53	81.1941	38	11	99	0.111111	192336	4552.33	45.9831
39	166	239	0.694561	818462	19371.9	81.0539	39	18	35	0.514286	59984	1419.74	40.564	39	37	142	0.260563	243002	5751.53	40.5037	39	10	39	0.25641	75809	1794.3	46.0076	39	8	87	0.091954	40092	3795.69	43.6286
40	47	61	0.770492	143966	3407.48	55.8603	40	46	178	0.258427	320412	7583.72	42.6051	40	41	139	0.294964	190498	4508.83	32.4376	40	76	263	0.288973	871076	20617.2	78.3923	40	6	76	0.0789474	100310	2374.2	31.2395
41	33	47	0.702128	118310	2800.24	59.5795	41	14	54	0.259259	114908	2719.72	50.3651	41	16	34	0.470588	62259	1473.59	43.3408	41	35	189	0.185185	685698	16229.5	85.8706	41	5	40	0.125	62494	1479.15	36.9787
42	20	32	0.625	64699	1531.34	47.8543	42	6	30	0.2	45309	1072.4	35.7467	42	17	36	0.472222	73540	1740.59	48.3498	42	10	64	0.15625	263463	6235.81	97.4345	42	7	143	0.048951	321202	7602.41	53.1637
43	12	25	0.48	53965	1277.28	51.0911	43	33	140	0.235714	163366	3866.65	27.6189	43	11	49	0.22449	92078	2179.36	44.4768	43	25	195	0.128205	605981	14342.7	73.5525	43	10	62	0.16129	138659	3281.87	52.9334
44	33	48	0.6875	114818	2717.59	56.6164	44	8	54	0.148148	78451	1856.83	34.3857	44	13	32	0.40625	38833	919.124	28.7226	44	49	132	0.371212	463281	10965.2	83.0699	44	7	26	0.269231	65469	1549.56	59.5985
45	35	47	0.744681	68428	1619.6	34.4595	45	13	71	0.183099	107492	2544.19	35.8337	45	27	69	0.391304	127119	3008.73	43.6048	45	18	35	0.514286	102778	2432.62	69.5033	45	15	27	0.555556	53062	1255.91	46.515
46	21	36	0.583333	68650	1624.85	45.1348	46	12	47	0.255319	70453	1667.53	35.4793	46	10	28	0.357143	45576	1078.72	38.5258	46	110	288	0.381944	945242	22372.6	77.6826	46	22	67	0.328358	104945	2483.91	37.0732
47	54	69	0.782609	194348	4599.95	66.666	47	21	60	0.35	118639	2808.02	46.8004	47	6	28	0.214286	41974	993.467	35.481	47	23	63	0.365079	48843	1156.05	18.35	47	21	55	0.381818	71007	1680.64	30.5571
48	16	25	0.64	33267	787.385	31.4954	48	11	49	0.22449	59959	1419.15	28.9622	48	30	65	0.461538	96720	2289.23	35.2189	48	125	446	0.280269	346968	8212.26	18.4131	48	44	163	0.269939	240727	5697.68	34.9551
49	29	42	0.690476	100662	2382.53	56.727	49	8	31	0.258065	45874	1085.78	35.025	49	6	21	0.285714	44808	1060.54	50.5021	49	21	50	0.42	156212	3697.33	73.9465	49	16	74	0.216216	78153	1849.78	24.997
50	25	40	0.625	82622	1955.55	48.8888	50	20	42	0.47619	117464	2780.21	66.1955	50	22	35	0.628571	47256	1118.49	31.9567	50	6	31	0.193548	116089	2747.67	88.6345	50	17	37	0.459459	84185	1992.54	53.8526
51	9	14	0.642857	33618	795.692	56.8352															51	62	129	0.48062	372279	8811.34	68.3049
52	8	15	0.533333	17257	408.45	27.23															52	49	188	0.260638	649402	15370.5	81.7578
53	24	41	0.585366	112737	2668.33	65.0813															53	40	102	0.392157	273499	6473.35	63.4642
54	80	106	0.754717	357262	8455.91	79.7727															54	45	84	0.535714	240049	5681.63	67.6385
55	17	35	0.485714	84700	2004.73	57.2781															55	47	122	0.385246	344895	8163.2	66.9114
56	18	39	0.461538	106222	2514.13	64.4649															56	35	194	0.180412	655485	15514.4	79.9713
57	108	141	0.765957	362994	8591.57	60.9331															57	35	98	0.357143	308077	7291.76	74.4057
58	58	91	0.637363	304275	7201.78	79.1404															58	25	100	0.25	341539	8083.76	80.8376
59	61	89	0.685393	266122	6298.75	70.7724															59	18	49	0.367347	137704	3259.27	66.5156
60	19	32	0.59375	52885	1251.72	39.1161															60	82	316	0.259494	737064	17445.3	55.2067
61	61	94	0.648936	194611	4606.18	49.0019															61	90	312	0.288462	313974	29725.3	95.2736
62	48	59	0.813559	205704	4868.73	82.5209															62	6	28	0.214286	69509	1645.18	58.7566
63	30	43	0.697674	106987	2532.24	58.8892															63	2	13	0.153846	35260	834.556	64.1966
64	263	363	0.724518	1109334	26256.4	72.3318															64	65	222	0.292793	768805	18196.6	81.9665
65	25	34	0.735294	69028	1633.8	48.0529															65	60	258	0.232558	725419	17169.7	66.5491
66	18	31	0.580645	73242	1733.54	55.9206															66	22	87	0.252874	271537	6426.91	73.8725
67	37	52	0.711538	136295	3225.92	62.0369															67	24	74	0.324324	290147	6867.38	92.8025
68	57	74	0.77027	224318	5309.3	71.7473															68	56	181	0.309392	662874	15689.3	86.6814
69	181	257	0.70428	789766	18692.7	72.7342															69	6	36	0.166667	111934	2649.33	73.5924
70	16	24	0.666667	59702	1413.07	58.8777															70	12	18	0.666667	30949	732.521	40.6956
71	25	42	0.595238	104888	2482.56	59.1085
72	37	48	0.770833	154043	3645.99	75.9581
73	333	428	0.778037	509182	12051.6	56.3161
74	321	416	0.771635	453531	10734.5	51.608
75	64	75	0.853333	204748	4846.11	64.6148
Average	130.107	174.133	0.717858	474689	11235.2	62.0169	Average	19.98	98.96	0.230809	154178	4029.05	40.6573	Average	21.76	87.68	0.316216	165354	3913.69	44.7235	Average	30.8429	111.186	0.287171	313693	7743.17	68.8035	Average	29.78	120.12	0.294346	226356	5414.47	45.8573
																					E15 is like control ?
Resolution of the picture	2880x1800	pixle					insulin positive cell NO.	Total Cell NO.in islet	insulin/Total	single cell area（mm2）
	50μm=	325	pixle			Control	130.107	174.133	0.717858	62.0169
	1μm=	6.5	pixle			STZ model	19.98	98.96	0.230809	40.6573
	1μm2=	42.25	pixle			OA	21.76	87.68	0.316216	44.7234
						Ethanol	30.8429	111.186	0.287171	68.8036
						OA+Etoh	29.78	120.12	0.294346	45.8573
