# Supplementary material for: Oleanolic acid and moderate drinking increase the pancreatic GLP-1R expression of the β -cell mass deficiency induced hyperglycemia
Source: PeerJ journal article supplement (doi:10.7717/peerj.15705), 2023-07-24
Supplement: Fig51IHCGLP1R.zip [file Fig.5 GLP1R positive cells analysis.xlsx]

## Sheet: RAW
Control	GLP1R positive cell NO.	Total Cell NO.in islet	GLP1R ip/Total	islet area（Pixel）	islet area（um2）	single cell area（um2）	Hyperglycemia	GLP1R positive cell NO.	Total Cell NO.in islet	GLP1R ip/Total	islet area（Pixel）	islet area（um2）	single cell area（um2）	OA	GLP1R positive cell NO.	Total Cell NO.in islet	GLP1R ip/Total	islet area（Pixel）	islet area（um2）	single cell area（um2）	Ethanol	GLP1R positive cell NO.	Total Cell NO.in islet	GLP1R ip/Total	islet area（Pixel）	islet area（um2）	single cell area（um2）	OA+Ethanol	GLP1R positive cell NO.	Total Cell NO.in islet	GLP1R ip/Total	islet area（Pixel）	islet area（um2）	single cell area（um2）
1	71	110	0.645455	304036	7196.12	65.4193	1	13	112	0.116071	373716	8845.35	78.9763	1	17	58	0.293103	65217	1543.6	26.6138	1	82	138	0.594203	389666	9222.86	66.8323	1	29	41	0.707317	70437	1667.15	40.6621
2	381	442	0.861991	1075573	25457.3	57.5958	2	46	230	0.2	369963	8756.52	38.0718	2	19	32	0.59375	49293	1166.7	36.4593	2	69	181	0.381215	488787	11568.9	63.9167	2	126	173	0.728324	311622	7375.67	42.6339
3	133	171	0.777778	492660	11660.6	68.1906	3	8	50	0.16	78927	1868.09	37.3619	3	18	36	0.5	73825	1747.34	48.5371	3	52	125	0.416	303451	7182.27	57.4582	3	126	195	0.646154	359925	8518.93	43.6868
4	179	213	0.840376	608074	14392.3	67.5694	4	27	69	0.391304	106155	2512.54	36.4137	4	72	128	0.5625	170007	4023.83	31.4362	4	12	27	0.444444	59310	1403.79	51.9921	4	11	23	0.478261	39974	946.13	41.1361
5	69	96	0.71875	253984	6011.46	62.6193	5	38	122	0.311475	210009	4970.63	40.7428	5	39	55	0.709091	96721	2289.25	41.6228	5	22	66	0.333333	208667	4938.86	74.8313	5	13	21	0.619048	39434	933.349	44.4452
6	103	110	0.936364	401880	9511.95	86.4723	6	13	53	0.245283	96291	2279.08	43.0015	6	32	52	0.615385	85873	2032.5	39.0865	6	110	194	0.56701	633352	14990.6	77.271	6	18	24	0.75	52637	1245.85	51.9103
7	178	194	0.917526	712347	16860.3	86.9087	7	11	66	0.166667	114439	2708.62	41.0396	7	17	31	0.548387	58140	1376.09	44.3902	7	73	147	0.496599	456845	10812.9	73.5571	7	142	203	0.699507	419851	9937.3	48.9522
8	524	581	0.901893	1978036	46817.4	80.5808	8	6	12	0.5	30245	715.858	59.6548	8	21	25	0.84	43413	1027.53	41.1011	8	17	37	0.459459	107985	2555.86	69.0772	8	73	83	0.879518	114180	2702.49	32.5601
9	89	105	0.847619	305659	7234.53	68.9003	9	5	25	0.2	33043	782.083	31.2833	9	13	22	0.590909	35266	834.698	37.9408	9	23	153	0.150327	337311	7983.69	52.181	9	74	88	0.840909	139726	3307.12	37.581
10	42	56	0.75	157573	3729.54	66.5989	10	36	116	0.310345	232286	5497.89	47.3956	10	27	48	0.5625	80428	1903.62	39.6588	10	78	118	0.661017	30753	727.882	6.16849	10	54	89	0.606742	194659	4607.31	51.7676
11	184	216	0.851852	604585	14309.7	66.2486	11	22	86	0.255814	138019	3266.72	37.9851	11	12	18	0.666667	18404	435.598	24.1999	11	19	30	0.633333	52059	1232.17	41.0722	11	19	32	0.59375	65484	1549.92	48.4349
12	154	176	0.875	512519	12130.6	68.924	12	45	116	0.387931	214428	5075.22	43.7519	12	30	45	0.666667	72508	1716.17	38.137	12	111	190	0.584211	496074	11741.4	61.7968	12	34	45	0.755556	77133	1825.63	40.5696
13	26	34	0.764706	100588	2380.78	70.023	13	18	47	0.382979	126596	2996.36	63.7522	13	12	19	0.631579	34543	817.586	43.0308	13	95	170	0.558824	376605	8913.73	52.4337	13	130	158	0.822785	476955	11288.9	71.4486
14	28	34	0.823529	92990	2200.95	64.7337	14	8	36	0.222222	69582	1646.91	45.7475	14	76	131	0.580153	157797	3734.84	28.5102	14	12	18	0.666667	46782	1107.27	61.5148	14	58	71	0.816901	160945	3809.35	53.6528
15	71	82	0.865854	228975	5419.53	66.0918	15	12	57	0.210526	82296	1947.83	34.1725	15	33	51	0.647059	66258	1568.24	30.7497	15	117	201	0.58209	622370	14730.7	73.2868	15	291	341	0.853372	1082154	25613.1	75.1118
16	17	21	0.809524	67875	1606.51	76.5004	16	21	125	0.168	238626	5647.95	45.1836	16	35	45	0.777778	66353	1570.49	34.8997	16	46	69	0.666667	180754	4278.2	62.0029	16	210	258	0.813953	893285	21142.8	81.949
17	54	56	0.964286	120207	2845.14	50.806	17	17	86	0.197674	155537	3681.35	42.8064	17	61	103	0.592233	153245	3627.1	35.2146	17	37	77	0.480519	226437	5359.46	69.6033	17	29	37	0.783784	134040	3172.54	85.7444
18	148	187	0.791444	554893	13133.6	70.233	18	11	43	0.255814	109122	2582.77	60.0644	18	27	35	0.771429	86526	2047.95	58.5129	18	9	126	0.0714286	400368	9476.17	75.2077	18	231	269	0.858736	1145034	27101.4	100.749
19	95	109	0.87156	360953	8543.27	78.3786	19	4	31	0.129032	41532	983.006	31.7099	19	148	184	0.804348	245481	5810.2	31.5772	19	2	20	0.1	30294	717.018	35.8509	19	30	40	0.75	116997	2769.16	69.229
20	352	402	0.875622	1375517	32556.6	80.9866	20	14	64	0.21875	124501	2946.77	46.0433	20	43	57	0.754386	98110	2322.13	40.7391	20	8	146	0.0547945	508212	12028.7	82.3883	20	41	47	0.87234	113679	2690.63	57.2474
21	409	453	0.90287	1830345	43321.8	95.6331	21	14	66	0.212121	158522	3752	56.8485	21	34	48	0.708333	109605	2594.2	54.0459	21	53	79	0.670886	211102	4996.5	63.2468	21	87	113	0.769912	330699	7827.2	69.2672
22	41	50	0.82	160728	3804.21	76.0843	22	35	84	0.416667	193172	4572.12	54.43	22	74	101	0.732673	212082	5019.69	49.6999	22	93	167	0.556886	448602	10617.8	63.5796	22	30	40	0.75	93955	2223.79	55.5947
23	386	446	0.865471	1307108	30937.5	69.3665	23	46	106	0.433962	216558	5125.63	48.355	23	66	100	0.66	173646	4109.96	41.0996	23	18	36	0.5	81804	1936.19	53.783	23	197	228	0.864035	713439	16886.1	74.062
24	53	66	0.80303	181054	4285.3	64.9288	24	16	31	0.516129	55658	1317.35	42.4951	24	44	86	0.511628	133928	3169.89	36.8592	24	16	26	0.615385	65047	1539.57	59.2144	24	22	29	0.758621	6698	158.533	5.46664
25	31	49	0.632653	125836	2978.37	60.783	25	8	19	0.421053	29694	702.817	36.9903	25	24	57	0.421053	93940	2223.43	39.0076	25	116	161	0.720497	496189	11744.1	72.9448	25	152	187	0.812834	572580	13552.2	72.4716
26	12	18	0.666667	51943	1229.42	68.3011	26	31	79	0.392405	110841	2623.46	33.2083	26	60	96	0.625	152221	3602.86	37.5298	26	11	17	0.647059	31765	751.834	44.2255	26	38	124	0.306452	255524	6047.91	48.7734
27	17	25	0.68	44686	1057.66	42.3063	27	26	79	0.329114	104808	2480.66	31.4008	27	127	198	0.641414	337086	7978.37	40.2948	27	13	17	0.764706	44702	1058.04	62.2374	27	57	156	0.365385	230572	5457.33	34.9829
28	261	292	0.893836	737698	17460.3	59.7956	28	1	67	0.0149254	79682	1885.96	28.1487	28	35	47	0.744681	71945	1702.84	36.2306	28	30	50	0.6	103923	2459.72	49.1943	28	43	225	0.191111	35364	837.018	3.72008
29	162	186	0.870968	618211	14632.2	78.6678	29	8	22	0.363636	59656	1411.98	64.1807	29	61	118	0.516949	149405	3536.21	29.9679	29	401	618	0.648867	1807458	42780.1	69.2234	29	28	119	0.235294	172159	4074.77	34.2418
30	76	88	0.863636	233626	5529.61	62.8365	30	12	35	0.342857	41953	992.97	28.3706	30	33	62	0.532258	103612	2452.36	39.5541	30	108	167	0.646707	405115	9588.52	57.4163	30	9	24	0.375	41256	976.473	40.6864
31	553	610	0.906557	1666751	39449.7	64.6717	31	121	315	0.384127	41953	992.97	3.15229	31	35	57	0.614035	80139	1896.78	33.2769	31	244	331	0.73716	594549	14072.2	42.5141	31	50	102	0.490196	167360	3961.18	38.8351
32	63	73	0.863014	191914	4542.34	62.2239	32	8	29	0.275862	34478	816.047	28.1396	32	44	53	0.830189	56987	1348.8	25.4491	32	25	46	0.543478	147438	3489.66	75.8621	32	58	124	0.467742	175250	4147.93	33.451
33	361	400	0.9025	1329363	31464.2	78.6605	33	8	14	0.571429	31292	740.639	52.9028	33	58	83	0.698795	133167	3151.88	37.9745	33	100	138	0.724638	367879	8707.2	63.0956	33	99	263	0.376426	468175	11081.1	42.1333
34	97	111	0.873874	401999	9514.77	85.7186	34	200	298	0.671141	704107	16665.3	55.9237	34	48	77	0.623377	105387	2494.37	32.3944	34	28	49	0.571429	153140	3624.62	73.9717	34	167	291	0.573883	475106	11245.1	38.643
35	118	133	0.887218	447288	10586.7	79.5992	35	8	43	0.186047	56031	1326.18	30.8413	35	150	168	0.892857	259645	6145.44	36.58	35	173	230	0.752174	625592	14806.9	64.3779	35	55	106	0.518868	133215	3153.02	29.7455
36	369	410	0.9	1362660	32252.3	78.6642	36	63	139	0.453237	205813	4871.31	35.0454	36	61	92	0.663043	114501	2710.08	29.4574	36	24	34	0.705882	76742	1816.38	53.4229	36	18	29	0.62069	41879	991.219	34.18
37	169	193	0.875648	652069	15433.6	79.9668	37	39	71	0.549296	105360	2493.73	35.1229	37	44	57	0.77193	63085	1493.14	26.1954	37	72	111	0.648649	330984	7833.94	70.576	37	143	383	0.373368	632940	14980.8	39.1144
38	12	17	0.705882	44013	1041.73	61.2781	38	17	39	0.435897	76320	1806.39	46.3177	38	9	34	0.264706	61699	1460.33	42.9509	38	78	124	0.629032	322080	7623.2	61.4774	38	43	85	0.505882	150251	3556.24	41.8381
39	131	151	0.86755	616432	14590.1	96.6232	39	26	73	0.356164	126178	2986.46	40.9104	39	19	26	0.730769	34133	807.882	31.0724	39	37	62	0.596774	148539	3515.72	56.7051	39	9	17	0.529412	48611	1150.56	67.6798
40	134	145	0.924138	462787	10953.5	75.5416	40	75	133	0.56391	265488	6283.74	47.2462	40	42	97	0.43299	217556	5149.25	53.0851	40	144	198	0.727273	571371	13523.6	68.3009	40	39	93	0.419355	152751	3615.41	38.8754
41	19	23	0.826087	74510	1763.55	76.6761	41	4	10	0.4	26120	618.225	61.8225	41	41	136	0.301471	358627	8488.21	62.4133	41	66	93	0.709677	218228	5165.16	55.5394	41	14	54	0.259259	114263	2704.45	50.0824
42	109	124	0.879032	526307	12457	100.459	42	16	52	0.307692	115842	2741.82	52.7274	42	25	57	0.438596	122514	2899.74	50.8726	42	138	189	0.730159	397530	9408.99	49.783	42	16	24	0.666667	40373	955.574	39.8156
43	18	22	0.818182	72932	1726.2	78.4637	43	22	47	0.468085	74204	1756.31	37.3682	43	26	65	0.4	122827	2907.15	44.7254	43	60	90	0.666667	222284	5261.16	58.4573	43	28	38	0.736842	44487	1052.95	27.7091
44	40	46	0.869565	167868	3973.21	86.3741	44	62	285	0.217544	777404	18400.1	64.5617	44	58	96	0.604167	137395	3251.95	33.8745	44	95	231	0.411255	535480	12674.1	54.8662	44	36	83	0.433735	125971	2981.56	35.9224
45	35	42	0.833333	137683	3258.77	77.5897	45	81	145	0.558621	217479	5147.43	35.4995	45	39	83	0.46988	136819	3238.32	39.0159	45	73	98	0.744898	258072	6108.21	62.3287	45	85	197	0.431472	263622	6239.57	31.673
46	146	165	0.884848	605207	14324.4	86.8147	46	9	23	0.391304	27900	660.355	28.7111								46	48	63	0.761905	151095	3576.21	56.7653	46	133	159	0.836478	292465	6922.25	43.5362
47	346	386	0.896373	1413773	33462.1	86.6893	47	8	52	0.153846	102766	2432.33	46.7756															47	98	143	0.685315	216733	5129.78	35.8726
48	196	212	0.924528	641586	15185.5	71.6296	48	10	56	0.178571	95685	2264.73	40.4417															48	128	174	0.735632	269895	6388.05	36.7129
49	137	149	0.919463	464809	11001.4	73.8349	49	25	123	0.203252	241226	5709.49	46.4186															49	69	90	0.766667	126307	2989.51	33.2168
50	15	17	0.882353	60394	1429.44	84.0849	50	32	140	0.228571	286739	6786.72	48.4766															50	59	80	0.7375	159086	3765.35	47.0669
51	350	389	0.899743	1207341	28576.1	73.4605	51	45	178	0.252809	327135	7742.84	43.4991
52	61	72	0.847222	206982	4898.98	68.0414	52	10	35	0.285714	69845	1653.14	47.2325
53	83	93	0.892473	213047	5042.53	54.2208	53	12	31	0.387097	52737	1248.21	40.2649
54	223	247	0.902834	932363	22067.8	89.3432
Average	150.574	172.185	0.84579	546301	12930.2	73.2058	Average	27.7925	84.2453	0.319867	152037	3598.51	43.3771	Average	44.6444	72.6444	0.611971	117764	2787.3	38.5788	Average	70.8261	123	0.563787	321148	7601.13	60.2511	Average	74.98	120.36	0.62942	251183	5945.15	46.8968
Resolution	2880x1800	pixel					GLP1R positive cell NO.	Total Cell NO.in islet	GLP1R/Total	single cell area（mm2）
50μm=	325	pixel				Control	150.574	172.185	0.84579	73.2058
1μm=	6.5	pixel				STZ model	27.7925	84.2453	0.319867	43.3771
1μm2=	42.25	pixel				OA	44.6444	72.6444	0.611971	38.5788
						Ethanol	70.8261	123	0.563787	60.2511
						OA+Etoh	74.98	120.36	0.62942	46.8968
1μm=	6.5	pixel
1μm2=	42.25
